# Supplementary material
Source: Springer Nature journal article supplement (http://www.springermedizin.de/resource/supplementary/12894_2004_33_MOESM1_ESM.pdf/9513762)

### Fascial interposition

Percent

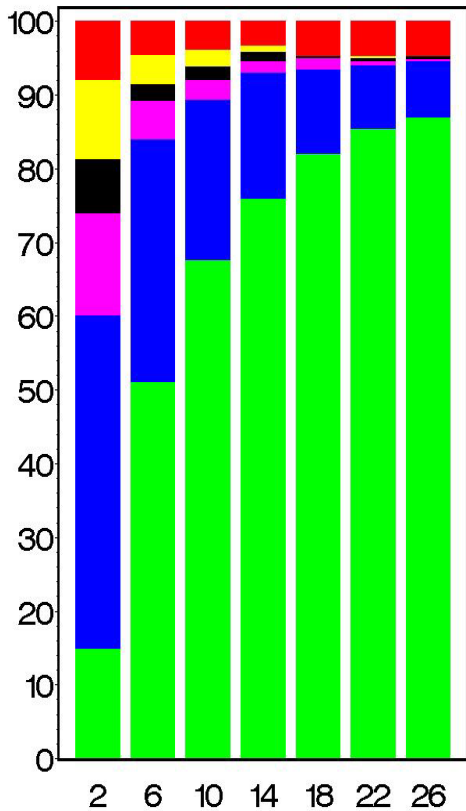

Week

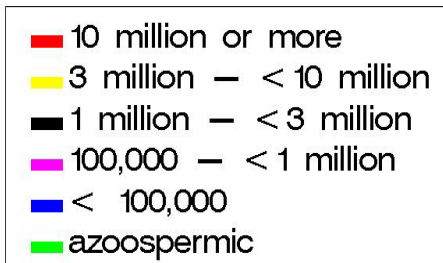

### Cautery

Percent

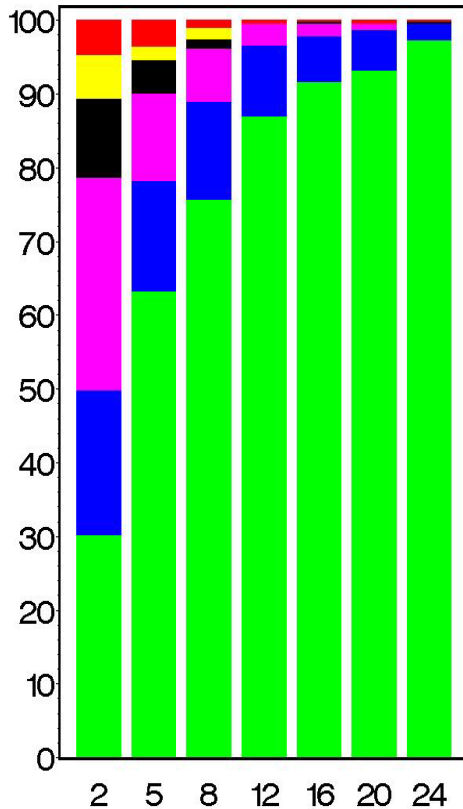

Week

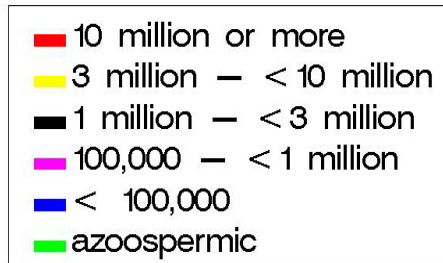

Supplement: MOESM1 [file 9513762]
